# Supplementary material
Source: Springer Nature journal article supplement (https://www.springermedizin.de/resource/supplementary/13054_2012_731_MOESM1_ESM.pdf/9709076)
Supplement: MOESM1 [file 9709076]

**Surgical intensive  
care patients  
(n = 740)**

**Hospitalization  $\leq 24$  hours  
(n = 227)  
Missing data (n = 6)**

**Included in  
analysis  
(n = 507)**

**No fever  
(n = 142)**

**Fever  $\leq 5$  days  
(n = 278)**

**Fever  $> 5$  days  
(n = 87)**
